# Supplementary material for: Probing the self-aggregation behavior and counter ion distribution of a copper surfactant complex
Source: Royal Society of Chemistry journal article supplement (doi:10.1039/c4nj00620h), 2014-01-01
Supplement: c4nj00620h1.pdf [file c4nj00620h1.pdf]

## Supporting Information

### **Probing the self-aggregation behavior and counter ion distribution of a copper surfactant complex**

Ravneet Kaur<sup>a</sup>, Sakshi Gupta<sup>a</sup>, Surinder K. Mehta<sup>a,\*</sup>, Yosuke Imai<sup>b</sup>, Takanori Takiue<sup>b</sup>, Hiroki Matsubara<sup>b</sup>, Makoto Aratono<sup>b\*</sup>

<sup>a</sup>*Department of Chemistry & Centre of Advanced Studies in Chemistry, Panjab university, Chandigarh – 160 014, India*

<sup>b</sup>*Department of Chemistry, Faculty of Sciences, Kyushu University, Hakozaki 6-10-1, Higashiku, Fukuoka 812-8581, Japan*

### ***Cyclic Voltammograms for cmc determination***

Cyclic voltammograms for copper surfactant complex are recorded at different concentrations to evaluate cmc. A typical cyclic voltammogram of the copper surfactant at 5mM concentration and scan rate of 100mV/s is shown in Figure 1. The redox peaks in the region -0.2 to -0.7 correspond to the reduction and oxidation of  $H^+$  and  $OH^-$  ions from water molecule [1]. The copper surfactant complex shows the oxidation peak at 1.04 V and correspondingly a reduction peak is observed at 0.70V. The overall redox potential of the system comes out to be 0.87 V.

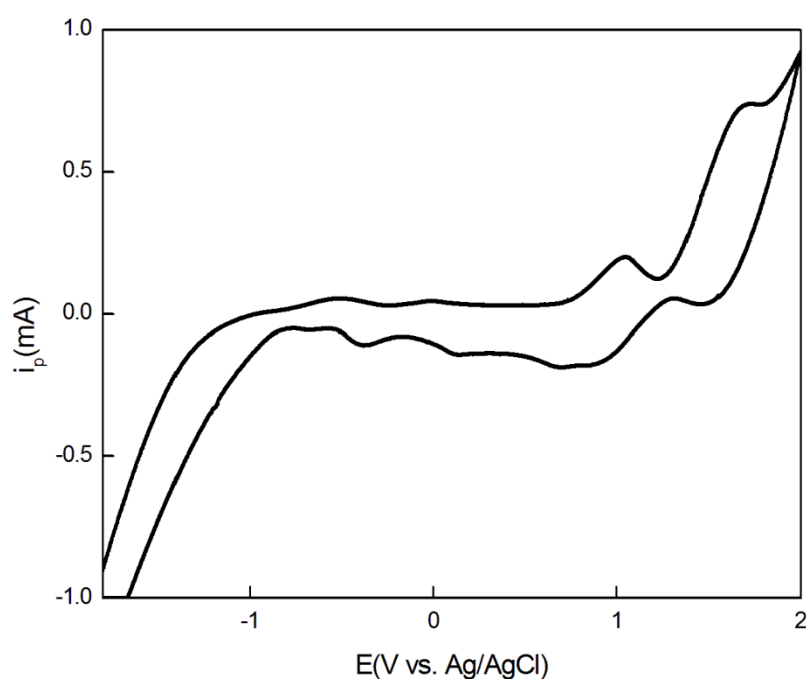

**Figure 1** Cyclic voltammograms of copper surfactant complex at the scan rate of 100mV/s.

### ***Calculations for Ellipsometric analysis:***

The values for surface density of each chemical species, used are  $\Gamma_{DTA} = 1.855 \mu\text{mol m}^{-2}$ ,  $\Gamma_{Br} = 1.03 \mu\text{mol m}^{-2}$ ,  $\Gamma_{Cl} = 0.22 \mu\text{mol m}^{-2}$  as determined in the manuscript (last section).  $\Gamma_{DTA}$  has been estimated from the peak height of ERA-FTIR (This value was almost half of that at 9.5 mM).  $\Gamma_{Br}$  and  $\Gamma_{Cl}$  are estimated with assumption that the composition of adsorbed film is equal to that at 9.5 mM.

- *Calculation of (TMA)* : Volume fraction of TMA, for head groups in the layer is calculated using eq.1 given below:

$$\phi(\text{TMA}) = \frac{\Gamma(\text{TMA}) \times V_m(\text{TMA})}{d_h} \quad (1)$$

where,  $\Gamma(\text{TMA})/d_h$  expresses the number of moles of TMA per  $\text{m}^3$ . The value of  $\Gamma(\text{TMA}) = \Gamma_{\text{DTA}} = 1.855 \mu\text{mol m}^{-2}$ ,  $V_m(\text{TMA}) = 62.3 \text{ cm}^3 \text{ mol}^{-1}$  (as estimated previously [2]) and  $\epsilon_w = 1.776$ .

- *Calculation of  $r_D$*  : In case of multivalent ions and in bulk solution, the equation used to calculate Debye length or  $r_D$  is:

$$r_D = \sqrt{\frac{\epsilon_0 \epsilon_r R T}{2 F I}} \quad (2)$$

where  $I = (1/2) \sum_i z_i^2 c_i$  is ionic strength ( $z_i$  is the valence of ion  $i$ , and  $c_i$  is the molality of ion,  $i$ ) which is calculated to be  $17.5 \text{ mol m}^{-3}$ ,  $\epsilon_0 = 8.85419 \times 10^{-12} \text{ J}^{-1} \text{ C}^2 \text{ m}^{-1}$ ,  $\epsilon_r = 78.36$  (relative permittivity of water),  $R = 8.314 \text{ J mol}^{-1} \text{ K}^{-1}$ ,  $T = 298.15 \text{ K}$  and  $F = 96484.56 \text{ C mol}^{-1}$ . Substituting the values in eq. (2) above, the value of  $r_D = 2.2975 \times 10^{-9} \text{ m}$ .

[1] Li Y., Hao J., Li G., J. Disp. Sci. Tech., 27 (2006) 781.

[2] Wilkinson K.M., Bain C.D., Matsubara H., Aratono M., Chem. Phys. Chem., 6 (2005) 547.
